# Supplementary material
Source: publisher figshare collection journal article supplement (https://frontiersin.figshare.com/ndownloader/files/15168725)
Supplement: Supplementary file [file 15168725]

| Study               | Year | Region/Country   | Samples Size(Case/HC) | Mean Age(Case/HC)           | Gender (%) | Mean disease duration (year) | Mean PANSS score | Sample Source | Assay type          | Serum, S100B Concentrations ( $\bar{X} \pm S$ ) (Case/HC, ng/ml) |
|---------------------|------|------------------|-----------------------|-----------------------------|------------|------------------------------|------------------|---------------|---------------------|------------------------------------------------------------------|
| Chen G et al. 2011  | 2011 | Jiangshu, China  | 30/50                 | 32.1±14.6/33.9±11.4         | 56.666     | NA                           | NA               | Serum         | ELISA               | 1.6756±0.4903/0.8892±0.3678                                      |
| Hao WH et al. 2017  | 2017 | Hebei, China     | 48/40                 | 1-11month/1.5-12            | 70.833     | NA                           | NA               | Serum         | ELISA               | 1.23369 ± 0.20847/0.16844±0.04516                                |
| Liu DH et al. 2011  | 2011 | Guangdong, China | 82/20                 | 7.01 ± 4.05/7.6 ± 3.28      | 60.98      | NA                           | NA               | Serum         | ELISA               | 0.87 ± 1.06/0.16 ± 0.58                                          |
| Yuan XD et al. 2014 | 2014 | Zhejiang, China  | 208/135               | 6.13 ± 5.02/5.09 ± 4.16     | 53.846     | NA                           | NA               | Serum         | ELISA               | 0.29008±0.001/0.15380 ± 0.001                                    |
| Wang B et al. 2012  | 2012 | Liaoning, China  | 35/35                 | 25.3±4.7/25.2±4.9           | 34.286     | 12.1±2.5                     |                  | Serum         | ELISA               | 1.52±0.11/0.23±0.09                                              |
| Wang J et al. 2016  | 2016 | Shandong, China  | 34/34                 | 35.99 ± 16.64/36.17 ± 16.93 | 55.882     | 3months-21Years              | NA               | Serum/CSF     | RT-PCR Western Blot | 0.911 ± 0.112/0.032 ± 0.115                                      |
| Wang ZJ et al. 2018 | 2018 | Beijing, China   | 39/34                 | 7 ~ 14 / 8 ~ 14             | 56.41      |                              | NA               | Serum/CSF     | ELISA               | 1.86 ± 0.24/0.52 ± 0.08                                          |
| Xu JY et al. 2012   | 2012 | Jiangshu, China  | 32/50                 | 32.1 ± 14.6/33.4 ± 11.4     | 56.25      | 8.7 ± 7.8/7.7 ± 5.9          | NA               | Serum         | ELISA               | 1.68 ± 0.49/0.89 ± 0.37                                          |

|                              |      |                               |        |                        |        |                            |    |              |                          |                              |
|------------------------------|------|-------------------------------|--------|------------------------|--------|----------------------------|----|--------------|--------------------------|------------------------------|
| Yun YL. 2009                 | 2009 | Inner Mongolia, China         | 69/50  | 19.85/9.33             | 63.768 | Iday-20year                | NA | Serum        | ELISA                    | 0.103±0.052/0.087±0.038      |
| Yun YL et al. 2015           | 2015 | Inner Mongolia, China         | 30/30  | 24.5±4.5/25±4.8        | 50     | NA                         | NA | Serum        | ELISA                    | 0.287±0.054/0.109±0.020      |
| Zhang YL et al. 2018         | 2018 | Helongjiang, China            | 68/30  | 69.7/55.3              | 57.353 | NA                         | NA | Serum        | ELISA                    | 0.31±0.10/0.11±0.06          |
| Zhao Q et al. 2017           | 2017 | Inner Mongolia, China         | 63/40  | 23.2/NA                | 55.55  | 3.6/NA                     | NA | Serum        | ELISA                    | 0.1397±0.007827/0.1401±0.034 |
| Atici Yeliz et al. 2012      | 2012 | Ankara, Turkey                | 39//30 | 17.4-7.3/17.1-9.8      | 56     | NA                         | NA | Serum        | ELISA                    | 0.0326±0.0078/0.0295±0.0078  |
| Lu CF et al. 2010            | 2010 | Beijing, China                | 28/28  | 27.3±7.7/26.4±8.4      | 50     | NA/NA                      | NA | Serum        | ELISA                    | 0.42±0.20/0.31±0.13          |
| Mikkonen Kirsi et al. 2012   | 2012 | Oulu, Finland                 | 103/33 | 1.8/1.4                | 60     | NA                         | NA | Serum/CSF    | Immunoluminometric assay | 0.12±0.001 /0.11±0.01        |
| Portela L.V.C et al. 2003    | 2003 | RS(Rio Grande do Sul), Brazil | 19/20  | 32.7 ± 9.1/33.9 ± 12.0 | 53.631 | 11.3 ( 8.9)/13.6 ( 9.8)/NA | NA | Serum        | Immunoluminometric assay | 0.005±0.001/0.016±0.001      |
| Shiihara Takashi et al. 2012 | 2012 | Gunma, Japan                  | 18/43  | 1.0/1.0                | 27.777 | 5.0/0/1.0                  | NA | serum or CSF | ELISA                    | 0.065.0±0.001/0.050±0.001    |

|                 |      |                    |       |                     |        |    |    |               |       |                         |
|-----------------|------|--------------------|-------|---------------------|--------|----|----|---------------|-------|-------------------------|
| Guang-Qian<br>L | 2004 | Zhejiang,<br>China | 31/38 | 4.3±3.1/4.1<br>±2.8 | 80.645 | NA | NA | Serum<br>/CSF | ELISA | 0.56±0.21/0.11±<br>0.05 |
|-----------------|------|--------------------|-------|---------------------|--------|----|----|---------------|-------|-------------------------|

Abbreviations: HC, Healthy Controls; ELISA, Enzyme-Linked ImmunoSorbent Assay; `X±S, `X, Mean of Concentrations; S=SD, standard deviation; CSF, Cerebrospinal Fluid; OR, Odds Ratio; RR, Risk ratio(Ie/Io) or Relative Risk ; 95%CI, 95% Confidence interval; RD, Risk Differnce; PANSS, Positive and Negative Symptoms Scale; NA, not available; S100B, Calcium-binding protein B
